# Supplementary material
Source: Royal Society of Chemistry journal article supplement (doi:10.1039/d5em00940e)
Supplement: d5em00940e1.pdf [file d5em00940e1.pdf]

## Supplemental information for

### Measurement of octanol-air and air-water partition coefficients of isopropyl and isobutyl nitrate

Ariana J. Buss,<sup>a</sup> Kevin D. Easterbrook,<sup>a</sup> Van Khanh Le,<sup>a</sup> Dmitry N. Ivanov,<sup>a</sup> Nicole Sandblom,<sup>a</sup>  
5 and Hans D. Osthoff<sup>a</sup>

<sup>a</sup>Department of Chemistry, University of Calgary, 2500 University Drive N.W., Calgary, Alberta, Canada  
T2N 1N4

10 *Correspondence to:* Hans D. Osthoff (hosthoff@ucalgary.ca)

*for Environ. Sci.: Processes Impacts*

|    |                                                                                                                                           |    |
|----|-------------------------------------------------------------------------------------------------------------------------------------------|----|
|    | Figure S1. Schematic of the jacketed bubble column apparatus.....                                                                         | 2  |
| 15 | Figure S2. Plots of $d\ln(c_{g,0}/c_{g,t})/dt$ versus $\Phi/V_1$ for (A) IPN and (B) IBN in DI water.....                                 | 3  |
|    | Figure S3. Natural logarithm of the octanol-water partition coefficients ( $K_{ow}$ ) of IPN, IBN, and EN as a function of $1000/T$ ..... | 4  |
|    | Table S1. Overview of experimental conditions for IPN and IBN in n-octanol. ....                                                          | 5  |
|    | Table S2. Overview of experimental conditions for IPN in DI water. ....                                                                   | 7  |
| 20 | Table S3. Overview of experimental conditions for IBN in DI water.....                                                                    | 8  |
|    | Table S4. Linear regression analyses of $d/dt(\ln(A_0/A_t))$ versus $\Phi/V_1$ for the data shown in Figures 3 and S2. ....               | 9  |
|    | Table S5. Dimensionless Henry's law constants of EN, IPN, and IBN. ....                                                                   | 10 |
|    | Table S6. Liquid-phase loss rate constants of EN, IPN and IBN.....                                                                        | 11 |
| 25 | References.....                                                                                                                           | 12 |

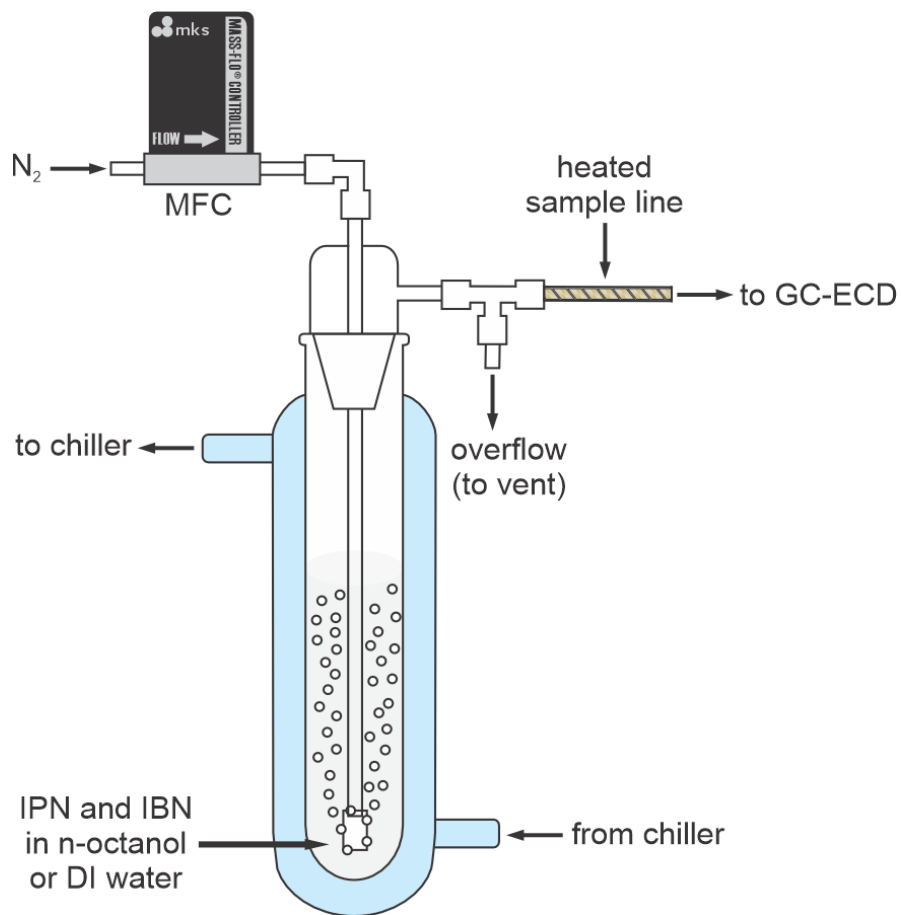

30 **Figure S1. Schematic of the jacketed bubble column apparatus** (not to scale). MFC = mass flow controller. GC-ECD = gas chromatograph with electron capture detection. DI water = deionized water.

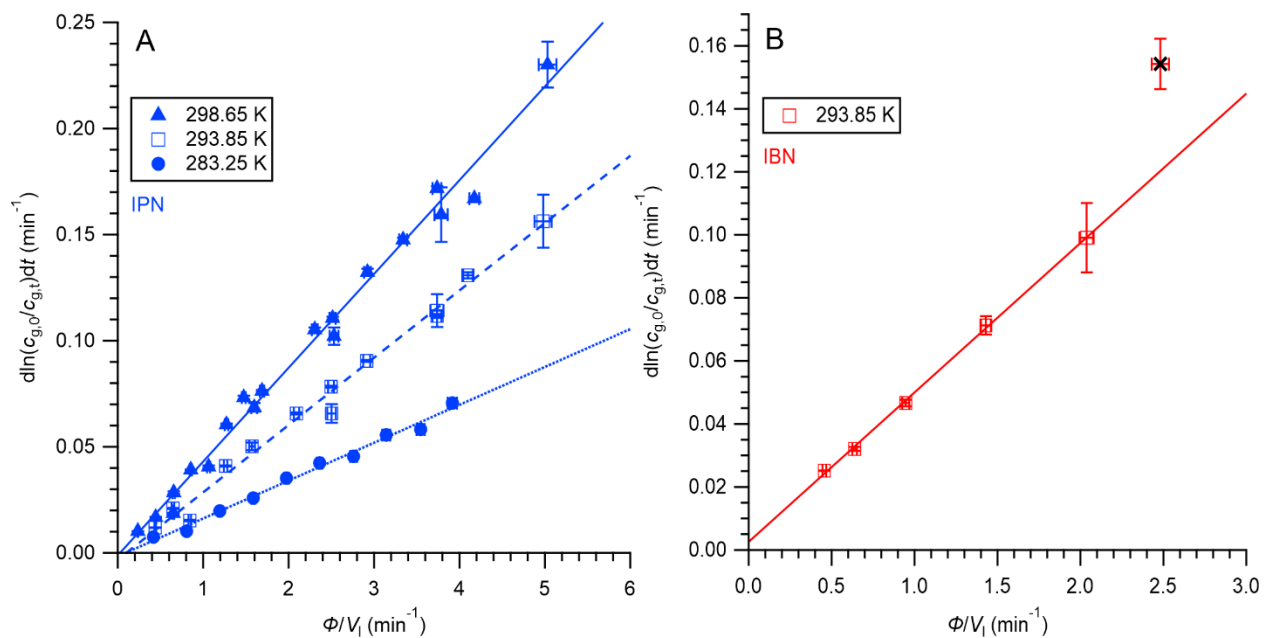

35 **Figure S2. Plots of  $\frac{d\ln(c_{g,0}/c_{g,t})}{dt}$  versus  $\Phi/V_1$  for (A) IPN and (B) IBN in DI water.** The IBN datum suspected to have not achieved equilibrium (crossed out in Table S3) is shown as a bolded cross ( $\times$ ) symbol. The straight lines are linear fits to the data at each temperature. Error bars are  $\pm 1\sigma$  precision.

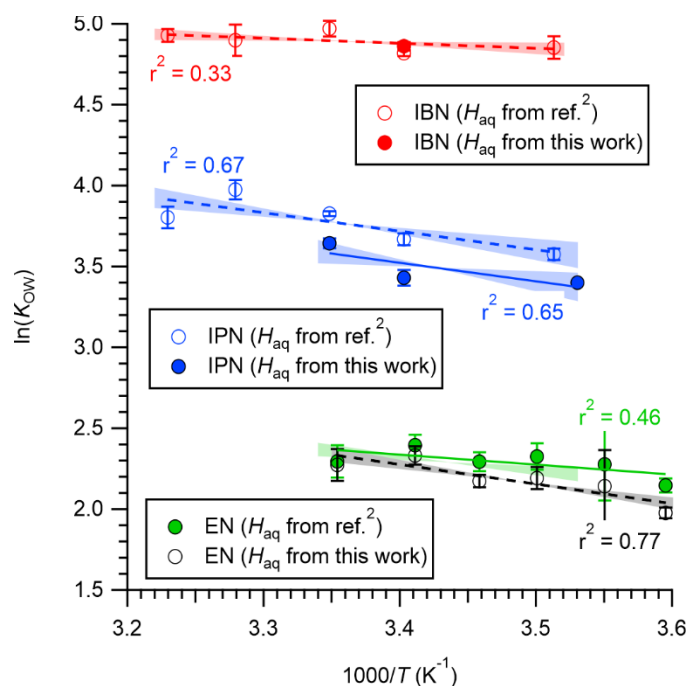

40 **Figure S3. Natural logarithm of the octanol-water partition coefficients ( $K_{OW}$ ) of IPN, IBN, and EN**  
**as a function of  $1000/T$ .** All  $K_{OW}$  values shown were calculated according to Eq. (2). For IPN (blue colour)  
 and IBN (red colour), the solid symbols ( $\bullet$ ) represent  $K_{OW}$  values calculated using  $H_{oct}$  and  $H_{aq}$  values  
 measured in this work. For EN, the solid symbols ( $\bullet$ , green colour) represent  $K_{OW}$  values calculated using  
 $H_{oct}$  and  $H_{aq}$  measured by Easterbrook et al.<sup>1</sup> The open symbols ( $\circ$ ) represent  $K_{OW}$  values calculated using  
 45  $H_{aq}$  values derived from the temperature dependence parameterizations of IPN, IBN, and EN reported by  
 Kames and Schurath.<sup>2</sup> The lines are linear fits to the data. The shaded regions represent upper and lower  
 error bounds for each linear fit, i.e.,  $\ln(K_{OW}) = (m+\sigma_m)/T + (b-\sigma_b)$  and  $\ln(K_{OW}) = (m-\sigma_m)/T + (b+\sigma_b)$ . Error  
 bars are  $\pm 1\sigma$  precision.

50 **Table S1. Overview of experimental conditions for IPN and IBN in n-octanol.** Uncertainties are at the  $\pm 1\sigma$  level. The  $\ln(c_{g,0}/c_{g,t})/dt$  data marked with a dash (-) indicates that the specified compound was not present.

| Internal reference | $T_{\text{setpoint}}$ (°C) | $T_{\text{corrected}}$ (°C) | $V_1$ (mL) | $\Phi$ (mL min <sup>-1</sup> ) | $\frac{\Phi}{V_1}$ (min <sup>-1</sup> ) | $\frac{d}{dt} \ln\left(\frac{c_{g,0}}{c_{g,t}}\right)$ for IPN (10 <sup>3</sup> min <sup>-1</sup> ) | r (%) | $\frac{d}{dt} \ln\left(\frac{c_{g,0}}{c_{g,t}}\right)$ for IBN (10 <sup>3</sup> min <sup>-1</sup> ) | r (%) |
|--------------------|----------------------------|-----------------------------|------------|--------------------------------|-----------------------------------------|-----------------------------------------------------------------------------------------------------|-------|-----------------------------------------------------------------------------------------------------|-------|
| KE 240705-3        | 25.00±0.01                 | 25.5±0.5                    | 100.0±0.6  | 190±1                          | 1.90±0.02                               | 2.391±0.008                                                                                         | 99.73 | 1.094±0.003                                                                                         | 99.69 |
| KL 240708-3        | 25.00±0.01                 | 25.5±0.5                    | 100.0±0.6  | 159±1                          | 1.59±0.01                               | -                                                                                                   | -     | 0.752±0.007                                                                                         | 99.55 |
| KL 240710-2        | 25.00±0.01                 | 25.5±0.5                    | 100.0±0.6  | 505±2                          | 5.05±0.03                               | 0.005.81±0.01                                                                                       | 99.99 | -                                                                                                   | -     |
| KL 240711-1        | 25.00±0.01                 | 25.5±0.5                    | 100.0±0.6  | 316±1                          | 3.16±0.02                               | 3.87±0.02                                                                                           | 99.93 | -                                                                                                   | -     |
| KL 240711-2        | 25.00±0.01                 | 25.5±0.5                    | 100.0±0.6  | 565±2                          | 5.65±0.04                               | 6.44±0.02                                                                                           | 99.96 | 2.412±0.006                                                                                         | 99.97 |
| KL 240712-2        | 25.00±0.01                 | 25.5±0.5                    | 100.0±0.6  | 253±1                          | 2.53±0.02                               | 3.109±0.006                                                                                         | 99.97 | 1.140±0.002                                                                                         | 99.95 |
| KL 240717          | 25.00±0.01                 | 25.5±0.5                    | 100.0±0.6  | 65±1                           | 0.65±0.01                               | 0.713±0.003                                                                                         | 99.83 | -                                                                                                   | -     |
| KL 240718          | 25.00±0.01                 | 25.5±0.5                    | 100.0±0.6  | 439±2                          | 4.39±0.03                               | 5.23±0.01                                                                                           | 99.98 | 1.890±0.003                                                                                         | 99.99 |
| KL 240719          | 25.00±0.01                 | 25.5±0.5                    | 150.0±2.0  | 65±1                           | 0.43±0.01                               | 0.513±0.001                                                                                         | 99.96 | -                                                                                                   | -     |
| KL 240722          | 25.00±0.01                 | 25.5±0.5                    | 150.0±2.0  | 347±1                          | 2.31±0.03                               | 2.70±0.01                                                                                           | 99.94 | 0.955±0.003                                                                                         | 99.95 |
| KL 240724          | 25.00±0.01                 | 25.5±0.5                    | 150.0±2.0  | 147±1                          | 0.98±0.01                               | 1.115±0.001                                                                                         | 99.99 | 0.383±0.003                                                                                         | 99.75 |
| KL 240725-1        | 25.00±0.01                 | 25.5±0.5                    | 150.0±2.0  | 537±2                          | 3.58±0.05                               | 4.25±0.01                                                                                           | 99.98 | 1.531±0.007                                                                                         | 99.95 |
| KL 240725-2        | 25.00±0.01                 | 25.5±0.5                    | 150.0±2.0  | 443±2                          | 2.96±0.04                               | 3.489±0.006                                                                                         | 99.99 | 1.328±0.003                                                                                         | 99.99 |
| KL 240726          | 25.00±0.01                 | 25.5±0.5                    | 150.0±2.0  | 224±1                          | 1.49±0.02                               | 1.793±0.004                                                                                         | 99.91 | 0.6484±0.0009                                                                                       | 99.97 |
| KL 240729          | 25.00±0.01                 | 25.5±0.5                    | 150.0±2.0  | 570±2                          | 3.80±0.05                               | 4.554±0.008                                                                                         | 99.99 | 1.632±0.002                                                                                         | 99.99 |
| AB 241009-1        | 20.00±0.01                 | 20.7±0.5                    | 100.0±2.0  | 403±2                          | 4.03±0.08                               | 3.78±0.01                                                                                           | 99.97 | 1.424±0.008                                                                                         | 99.83 |
| AB 241010-1        | 20.00±0.01                 | 20.7±0.5                    | 100.0±2.0  | 95±1                           | 0.95±0.02                               | 0.86±0.03                                                                                           | 98.28 | 0.31±0.03                                                                                           | 91.10 |
| AB 241010-2        | 20.00±0.01                 | 20.7±0.5                    | 100.0±2.0  | 187±1                          | 1.87±0.04                               | 1.765±0.006                                                                                         | 99.93 | 0.620±0.002                                                                                         | 99.95 |
| AB 241011-1        | 20.00±0.01                 | 20.7±0.5                    | 100.0±2.0  | 64±1                           | 0.64±0.01                               | 0.613±0.002                                                                                         | 99.95 | 0.221±0.001                                                                                         | 99.68 |
| AB 241015-1        | 20.00±0.01                 | 20.7±0.5                    | 100.0±2.0  | 498±2                          | 4.98±0.10                               | 4.68±0.02                                                                                           | 99.97 | 1.79±0.01                                                                                           | 99.86 |
| AB 241126-2        | 37.00±0.01                 | 36.5±0.5                    | 100.0±2.0  | 68±1                           | 0.68±0.02                               | 1.530±0.010                                                                                         | 99.87 | 0.91±0.03                                                                                           | 96.12 |
| AB 241127-1        | 37.00±0.01                 | 36.5±0.5                    | 100.0±2.0  | 426±2                          | 4.26±0.09                               | 9.5±0.2                                                                                             | 99.76 | 3.38±0.07                                                                                           | 99.51 |
| AB 241127-2        | 37.00±0.01                 | 36.5±0.5                    | 100.0±2.0  | 133±1                          | 1.33±0.03                               | 2.82±0.01                                                                                           | 99.97 | 1.26±0.03                                                                                           | 98.19 |
| AB 241128-1        | 37.00±0.01                 | 36.5±0.5                    | 100.0±2.0  | 589±2                          | 5.89±0.12                               | 13.4±0.2                                                                                            | 99.76 | 4.9±0.1                                                                                             | 99.11 |
| AB 241129-1        | 37.00±0.01                 | 36.5±0.5                    | 100.0±2.0  | 296±1                          | 2.96±0.06                               | 7.3±0.1                                                                                             | 99.29 | 2.57±0.02                                                                                           | 99.84 |
| KE 250106-2        | 32.00±0.01                 | 31.8±0.5                    | 100.0±2.0  | 130±1                          | 1.30±0.03                               | 1.91±0.05                                                                                           | 97.17 | 0.555±0.009                                                                                         | 98.66 |
| KE 250107-1        | 32.00±0.01                 | 31.8±0.5                    | 100.0±2.0  | 576±2                          | 5.76±0.12                               | 8.31±0.06                                                                                           | 99.93 | 3.53±0.08                                                                                           | 98.83 |
| KE 250107-2        | 32.00±0.01                 | 31.8±0.5                    | 100.0±2.0  | 387±2                          | 3.87±0.08                               | 5.73±0.05                                                                                           | 99.85 | 3.1±0.1                                                                                             | 93.88 |

55 **Table S1 (continued).** Overview of experimental conditions for IPN and IBN in n-octanol. Uncertainties are at the  $\pm 1\sigma$  level. The  $\ln(c_{g,0}/c_{g,t})/dt$  data marked with a dash (-) indicates that the specified compound was not present.

| Internal reference | $T_{\text{setpoint}}$ (°C) | $T_{\text{corrected}}$ (°C) | $V_1$ (mL) | $\Phi$ (mL min <sup>-1</sup> ) | $\frac{\Phi}{V_1}$ (min <sup>-1</sup> ) | $\frac{d}{dt} \ln\left(\frac{c_{g,0}}{c_{g,t}}\right)$ for IPN (10 <sup>3</sup> min <sup>-1</sup> ) | r (%) | $\frac{d}{dt} \ln\left(\frac{c_{g,0}}{c_{g,t}}\right)$ for IBN (10 <sup>3</sup> min <sup>-1</sup> ) | r (%) |
|--------------------|----------------------------|-----------------------------|------------|--------------------------------|-----------------------------------------|-----------------------------------------------------------------------------------------------------|-------|-----------------------------------------------------------------------------------------------------|-------|
| KE 250108-1        | 32.00±0.01                 | 31.8±0.5                    | 100.0±2.0  | 481±2                          | 4.81±0.10                               | 7.08±0.06                                                                                           | 99.83 | 2.77±0.04                                                                                           | 98.92 |
| KE 250109-1        | 32.00±0.01                 | 31.8±0.5                    | 100.0±2.0  | 323±1                          | 3.23±0.07                               | 4.68±0.03                                                                                           | 99.91 | 1.82±0.02                                                                                           | 98.97 |
| KE 250110-1        | 32.00±0.01                 | 31.8±0.5                    | 100.0±2.0  | 229±1                          | 2.29±0.05                               | 3.55±0.02                                                                                           | 99.88 | 1.323±0.005                                                                                         | 99.87 |
| KE 250113-1        | 32.00±0.01                 | 31.8±0.5                    | 100.0±2.0  | 419±2                          | 4.19±0.09                               | 6.42±0.05                                                                                           | 99.88 | 2.33±0.03                                                                                           | 99.50 |
| KE 250121-1        | 10.00±0.01                 | 11.5±0.5                    | 100.0±2.0  | 299±1                          | 2.99±0.06                               | 2.04±0.02                                                                                           | 99.63 | 0.75±0.02                                                                                           | 94.97 |
| KE 250122-1        | 10.00±0.01                 | 11.5±0.5                    | 100.0±2.0  | 475±2                          | 4.75±0.10                               | 3.17±0.03                                                                                           | 99.87 | 1.04±0.01                                                                                           | 99.24 |
| KE 250123-1        | 10.00±0.01                 | 11.5±0.5                    | 100.0±2.0  | 359±1                          | 3.59±0.07                               | 2.48±0.05                                                                                           | 99.45 | 0.81±0.02                                                                                           | 97.38 |
| KE 250124-1        | 10.00±0.01                 | 11.5±0.5                    | 100.0±2.0  | 180±1                          | 1.80±0.04                               | 1.214±0.008                                                                                         | 99.63 | 0.415±0.007                                                                                         | 97.77 |
| KE 250125-1        | 10.00±0.01                 | 11.5±0.5                    | 100.0±2.0  | 417±2                          | 4.17±0.08                               | 2.74±0.02                                                                                           | 99.82 | 0.93±0.01                                                                                           | 98.27 |
| KE 250127-1        | 10.00±0.01                 | 11.5±0.5                    | 100.0±2.0  | 240±1                          | 2.40±0.05                               | 1.70±0.01                                                                                           | 99.71 | 0.58±0.01                                                                                           | 97.73 |
| KE 250129-1        | 20.00±0.01                 | 20.7±0.5                    | 100.0±2.0  | 252±1                          | 2.52±0.05                               | -                                                                                                   | -     | 0.80±0.02                                                                                           | 96.75 |
| KE 250130-1        | 20.00±0.01                 | 20.7±0.5                    | 100.0±2.0  | 562±2                          | 5.62±0.11                               | 5.98±0.04                                                                                           | 99.95 | 2.06±0.05                                                                                           | 99.24 |
| KE 250131-1        | 20.00±0.01                 | 20.7±0.5                    | 100.0±2.0  | 157±1                          | 1.57±0.03                               | 1.64±0.01                                                                                           | 99.81 | 0.550±0.003                                                                                         | 99.50 |
| KE 250203-1        | 20.00±0.01                 | 20.7±0.5                    | 100.0±2.0  | 339±1                          | 3.39±0.07                               | 3.50±0.04                                                                                           | 99.15 | 1.23±0.01                                                                                           | 99.45 |
| KE 250204-1        | 20.00±0.01                 | 20.7±0.5                    | 100.0±2.0  | 280±1                          | 2.80±0.06                               | 2.84±0.02                                                                                           | 99.87 | 1.007±0.006                                                                                         | 99.75 |
| KE 250205-1        | 20.00±0.01                 | 20.7±0.5                    | 100.0±2.0  | 96±1                           | 0.96±0.02                               | 1.010±0.006                                                                                         | 99.85 | 0.37±0.01                                                                                           | 95.61 |
| KE 250206-1        | 20.00±0.01                 | 20.7±0.5                    | 100.0±2.0  | 465±2                          | 4.65±0.09                               | 5.01±0.04                                                                                           | 99.90 | 1.67±0.01                                                                                           | 99.66 |
| KE 250207-1        | 37.00±0.01                 | 36.5±0.5                    | 100.0±2.0  | 229±1                          | 2.29±0.05                               | 4.97±0.05                                                                                           | 99.86 | 1.77±0.01                                                                                           | 99.73 |
| KE 250210-1        | 37.00±0.01                 | 36.5±0.5                    | 100.0±2.0  | 488±2                          | 4.88±0.10                               | 9.51±0.09                                                                                           | 99.88 | 4.06±0.05                                                                                           | 99.76 |
| KE 250211-1        | 37.00±0.01                 | 36.5±0.5                    | 100.0±2.0  | 362±1                          | 3.62±0.07                               | 7.28±0.06                                                                                           | 99.91 | 3.14±0.03                                                                                           | 99.78 |
| KE 250212-1        | 32.00±0.01                 | 31.8±0.5                    | 100.0±2.0  | 164±1                          | 1.64±0.03                               | 3.22±0.04                                                                                           | 99.71 | 1.11±0.02                                                                                           | 98.28 |
| KE 250213-1        | 32.00±0.01                 | 31.8±0.5                    | 100.0±2.0  | 67±1                           | 0.67±0.02                               | 1.131±0.005                                                                                         | 99.80 | 0.443±0.003                                                                                         | 98.73 |
| KE 250218-1        | 32.00±0.01                 | 31.8±0.5                    | 100.0±2.0  | 360±1                          | 3.60±0.07                               | 6.39±0.09                                                                                           | 99.79 | 2.41±0.05                                                                                           | 97.06 |

**Table S2. Overview of experimental conditions for IPN in DI water.** Uncertainties are at the  $\pm 1\sigma$  level.

| Internal reference | $T_{\text{setpoint}}$<br>(°C) | $T_{\text{corrected}}$<br>(°C) | $V_1$<br>(mL) | $\Phi$<br>(mL<br>min <sup>-1</sup> ) | $\frac{\Phi}{V_1}$<br>(min <sup>-1</sup> ) | $\frac{d}{dt} \ln \left( \frac{c_{g,0}}{c_{g,t}} \right)$<br>(min <sup>-1</sup> ) | r<br>(%) |
|--------------------|-------------------------------|--------------------------------|---------------|--------------------------------------|--------------------------------------------|-----------------------------------------------------------------------------------|----------|
| KL 240731          | 25.00±0.01                    | 25.5±0.5                       | 150.0±2.0     | 67±1                                 | 0.44±0.01                                  | 0.0167±0.0002                                                                     | 99.89    |
| KL 240801-1        | 25.00±0.01                    | 25.5±0.5                       | 150.0±2.0     | 626±3                                | 4.17±0.06                                  | 0.1670±0.0006                                                                     | 100.0    |
| KL 240801-2        | 25.00±0.01                    | 25.5±0.5                       | 150.0±2.0     | 253±2                                | 1.69±0.02                                  | 0.0763±0.0004                                                                     | 99.98    |
| KL 240801-3        | 25.00±0.01                    | 25.5±0.5                       | 150.0±2.0     | 377±2                                | 2.51±0.04                                  | 0.1106±0.0008                                                                     | 99.98    |
| KL 240801-4        | 25.00±0.01                    | 25.5±0.5                       | 150.0±2.0     | 97±1                                 | 0.65±0.01                                  | 0.0186±0.0003                                                                     | 99.81    |
| KL 240802-1        | 25.00±0.01                    | 25.5±0.5                       | 150.0±2.0     | 128±1                                | 0.85±0.01                                  | 0.0392±0.0002                                                                     | 99.99    |
| KL 240802-2        | 25.00±0.01                    | 25.5±0.5                       | 150.0±2.0     | 35±1                                 | 0.23±0.01                                  | 0.01029±0.00003                                                                   | 99.91    |
| KL 240806-1        | 25.00±0.01                    | 25.5±0.5                       | 150.0±2.0     | 346±2                                | 2.31±0.03                                  | 0.1052±0.0010                                                                     | 99.97    |
| KL 240806-2        | 25.00±0.01                    | 25.5±0.5                       | 150.0±2.0     | 191±1                                | 1.27±0.02                                  | 0.0605±0.0005                                                                     | 99.99    |
| KL 240806-3        | 25.00±0.01                    | 25.5±0.5                       | 150.0±2.0     | 501±2                                | 3.34±0.05                                  | 0.1477±0.0010                                                                     | 99.99    |
| KL 240806-4        | 25.00±0.01                    | 25.5±0.5                       | 150.0±2.0     | 159±1                                | 1.06±0.02                                  | 0.0406±0.0006                                                                     | 99.94    |
| KL 240806-5        | 25.00±0.01                    | 25.5±0.5                       | 150.0±2.0     | 439±2                                | 2.92±0.04                                  | 0.132±0.002                                                                       | 99.56    |
| KL 240806-6        | 25.00±0.01                    | 25.5±0.5                       | 150.0±2.0     | 221±1                                | 1.48±0.02                                  | 0.0732±0.0009                                                                     | 99.97    |
| KL 240807-1        | 25.00±0.01                    | 25.5±0.5                       | 150.0±2.0     | 560±2                                | 3.74±0.05                                  | 0.172±0.001                                                                       | 99.98    |
| KL 240807-2        | 8.50±0.01                     | 10.1±0.5                       | 150.0±2.0     | 588±3                                | 3.92±0.05                                  | 0.0706±0.0002                                                                     | 99.99    |
| KL 240807-4        | 8.50±0.01                     | 10.1±0.5                       | 150.0±2.0     | 471±2                                | 3.14±0.04                                  | 0.0557±0.0003                                                                     | 99.99    |
| KL 240807-5        | 8.50±0.01                     | 10.1±0.5                       | 150.0±2.0     | 296±2                                | 1.97±0.03                                  | 0.03519±0.00006                                                                   | 99.99    |
| KL 240808-1        | 8.50±0.01                     | 10.1±0.5                       | 150.0±2.0     | 354±2                                | 2.36±0.03                                  | 0.0424±0.0004                                                                     | 99.98    |
| KL 240808-2        | 8.50±0.01                     | 10.1±0.5                       | 150.0±2.0     | 179±1                                | 1.19±0.02                                  | 0.01977±0.00008                                                                   | 99.98    |
| KL 240808-3        | 8.50±0.01                     | 10.1±0.5                       | 150.0±2.0     | 238±2                                | 1.58±0.02                                  | 0.0259±0.0001                                                                     | 99.99    |
| KL 240808-4        | 8.50±0.01                     | 10.1±0.5                       | 150.0±2.0     | 121±1                                | 0.81±0.01                                  | 0.01024±0.00008                                                                   | 99.93    |
| KL 240808-5        | 8.50±0.01                     | 10.1±0.5                       | 150.0±2.0     | 414±2                                | 2.76±0.04                                  | 0.0455±0.0001                                                                     | 99.98    |
| KL 240809-1        | 8.50±0.01                     | 10.1±0.5                       | 150.0±2.0     | 62±1                                 | 0.42±0.01                                  | 0.00756±0.00007                                                                   | 99.95    |
| KL 240809-2        | 8.50±0.01                     | 10.1±0.5                       | 150.0±2.0     | 532±2                                | 3.55±0.05                                  | 0.0582±0.0003                                                                     | 99.98    |
| KL 240809-3        | 20.00±0.01                    | 20.7±0.5                       | 150.0±2.0     | 615±3                                | 4.10±0.06                                  | 0.131±0.001                                                                       | 99.96    |
| KL 240809-4        | 20.00±0.01                    | 20.7±0.5                       | 150.0±2.0     | 126±1                                | 0.84±0.01                                  | 0.0152±0.0004                                                                     | 99.67    |
| KL 240809-6        | 20.00±0.01                    | 20.7±0.5                       | 150.0±2.0     | 65±1                                 | 0.44±0.01                                  | 0.01186±0.00006                                                                   | 99.98    |
| KL 240812-1        | 20.00±0.01                    | 20.7±0.5                       | 150.0±2.0     | 374±2                                | 2.50±0.04                                  | 0.0783±0.0005                                                                     | 99.98    |
| KL 240812-2        | 20.00±0.01                    | 20.7±0.5                       | 150.0±2.0     | 189±1                                | 1.26±0.02                                  | 0.0410±0.0002                                                                     | 99.99    |

60 **Table S2 (continued). Overview of experimental conditions for IPN in DI water. Uncertainties are at the  $\pm 1\sigma$  level.**

| Internal reference | $T_{\text{setpoint}}$<br>(°C) | $T_{\text{corrected}}$<br>(°C) | $V_1$<br>(mL) | $\Phi$<br>(mL min <sup>-1</sup> ) | $\frac{\Phi}{V_1}$<br>(min <sup>-1</sup> ) | $\frac{d}{dt} \ln \left( \frac{c_{g,0}}{c_{g,t}} \right)$<br>(min <sup>-1</sup> ) | r<br>(%) |
|--------------------|-------------------------------|--------------------------------|---------------|-----------------------------------|--------------------------------------------|-----------------------------------------------------------------------------------|----------|
| KL 240812-3        | 20.00±0.01                    | 20.7±0.5                       | 150.0±2.0     | 560±2                             | 3.74±0.05                                  | 0.112±0.001                                                                       | 99.98    |
| KL 240812-4        | 20.00±0.01                    | 20.7±0.5                       | 150.0±2.0     | 314±2                             | 2.09±0.03                                  | 0.0657±0.0005                                                                     | 99.98    |
| KL 240812-5        | 20.00±0.01                    | 20.7±0.5                       | 150.0±2.0     | 437±2                             | 2.91±0.04                                  | 0.0905±0.0004                                                                     | 99.98    |
| KE 250704-1        | 25.00±0.01                    | 25.5±0.5                       | 100.0±2.0     | 253±1                             | 2.53±0.05                                  | 0.102±0.004                                                                       | 99.76    |
| KE 250704-2        | 25.00±0.01                    | 25.5±0.5                       | 100.0±2.0     | 378±2                             | 3.78±0.08                                  | 0.16±0.01                                                                         | 99.68    |
| KE 250704-3        | 25.00±0.01                    | 25.5±0.5                       | 100.0±2.0     | 65±1                              | 0.65±0.02                                  | 0.0284±0.0006                                                                     | 99.78    |
| KE 250707-1        | 25.00±0.01                    | 25.5±0.5                       | 100.0±2.0     | 503±2                             | 5.03±0.10                                  | 0.23±0.01                                                                         | 99.89    |
| KE 250707-2        | 25.00±0.01                    | 25.5±0.5                       | 100.0±2.0     | 160±1                             | 1.60±0.03                                  | 0.069±0.002                                                                       | 99.83    |
| KE 250708-1        | 20.00±0.01                    | 20.7±0.5                       | 100.0±2.0     | 374±2                             | 3.74±0.08                                  | 0.114±0.008                                                                       | 99.55    |
| KE 250708-2        | 20.00±0.01                    | 20.7±0.5                       | 100.0±2.0     | 250±1                             | 2.50±0.05                                  | 0.066±0.004                                                                       | 99.56    |
| KE 250708-3        | 20.00±0.01                    | 20.7±0.5                       | 100.0±2.0     | 65±1                              | 0.65±0.02                                  | 0.0209±0.0003                                                                     | 99.83    |
| KE 250709-1        | 20.00±0.01                    | 20.7±0.5                       | 100.0±2.0     | 498±2                             | 4.98±0.10                                  | 0.16±0.01                                                                         | 99.68    |
| KE 250709-2        | 20.00±0.01                    | 20.7±0.5                       | 100.0±2.0     | 157±1                             | 1.57±0.03                                  | 0.050±0.002                                                                       | 99.58    |

**Table S3. Overview of experimental conditions for IBN in DI water. Uncertainties are at the  $\pm 1\sigma$  level.**

| Internal reference       | $T_{\text{setpoint}}$<br>(°C) | $T_{\text{corrected}}$<br>(°C) | $V_1$<br>(mL)        | $\Phi$<br>(mL min <sup>-1</sup> ) | $\frac{\Phi}{V_1}$<br>(min <sup>-1</sup> ) | $\frac{d}{dt} \ln \left( \frac{c_{g,0}}{c_{g,t}} \right)$<br>(min <sup>-1</sup> ) | r<br>(%)         |
|--------------------------|-------------------------------|--------------------------------|----------------------|-----------------------------------|--------------------------------------------|-----------------------------------------------------------------------------------|------------------|
| <del>KE 250714-1</del> * | <del>20.00±0.01</del>         | <del>20.7±0.5</del>            | <del>100.0±2.0</del> | <del>248±1</del>                  | <del>2.48±0.05</del>                       | <del>0.154±0.008</del>                                                            | <del>99.47</del> |
| KE 250714-2              | 20.00±0.01                    | 20.7±0.5                       | 100.0±2.0            | 95±1                              | 0.95±0.02                                  | 0.047±0.001                                                                       | 99.89            |
| KE 250714-5              | 20.00±0.01                    | 20.7±0.5                       | 100.0±2.0            | 64±1                              | 0.64±0.01                                  | 0.0321±0.0006                                                                     | 99.88            |
| KE 250715-1              | 20.00±0.01                    | 20.7±0.5                       | 100.0±2.0            | 204±1                             | 2.04±0.04                                  | 0.10±0.01                                                                         | 98.78            |
| KE 250715-2              | 20.00±0.01                    | 20.7±0.5                       | 100.0±2.0            | 143±1                             | 1.43±0.03                                  | 0.071±0.003                                                                       | 99.83            |
| KE 250715-3              | 20.00±0.01                    | 20.7±0.5                       | 100.0±2.0            | 46±1                              | 0.46±0.01                                  | 0.02521±0.00007                                                                   | 100.0            |

65 \* not used in the analysis.

**Table S4. Linear regression analyses of  $d/dt(\ln(A_0/A_t))$  versus  $\Phi/V_1$  for the data shown in Figures 3 and S2. Uncertainties are at the  $\pm 1\sigma$  level.**

| Compound | Solvent   | $T$<br>(K) | Slope                            | Intercept<br>( $\text{min}^{-1}$ ) | $r$<br>(%) |
|----------|-----------|------------|----------------------------------|------------------------------------|------------|
| IPN      | n-octanol | 284.65     | $(0.65 \pm 0.02) \times 10^{-3}$ | $(1.0 \pm 0.8) \times 10^{-4}$     | 99.76      |
|          |           | 293.85     | $(1.03 \pm 0.04) \times 10^{-3}$ | $-(0.6 \pm 1.3) \times 10^{-4}$    | 99.37      |
|          |           | 298.65     | $(1.16 \pm 0.02) \times 10^{-3}$ | $(0.7 \pm 0.6) \times 10^{-4}$     | 99.86      |
|          |           | 304.95     | $(1.42 \pm 0.09) \times 10^{-3}$ | $(4.0 \pm 3.0) \times 10^{-4}$     | 98.57      |
|          |           | 309.65     | $(2.16 \pm 0.14) \times 10^{-3}$ | $(0.4 \pm 5.2) \times 10^{-4}$     | 98.72      |
| IBN      | n-octanol | 284.65     | $(2.05 \pm 0.14) \times 10^{-4}$ | $(0.8 \pm 0.5) \times 10^{-4}$     | 99.04      |
|          |           | 293.85     | $(3.67 \pm 0.07) \times 10^{-4}$ | $-(0.3 \pm 0.2) \times 10^{-4}$    | 99.83      |
|          |           | 298.65     | $(4.14 \pm 0.20) \times 10^{-4}$ | $-(0.3 \pm 0.2) \times 10^{-4}$    | 98.93      |
|          |           | 304.95     | $(6.25 \pm 0.61) \times 10^{-4}$ | $-(0.2 \pm 2.1) \times 10^{-4}$    | 96.40      |
|          |           | 309.65     | $(7.76 \pm 0.30) \times 10^{-4}$ | $(2.3 \pm 1.1) \times 10^{-4}$     | 99.54      |
| IPN      | DI water  | 283.25     | $(1.78 \pm 0.06) \times 10^{-2}$ | $-(1.6 \pm 1.5) \times 10^{-3}$    | 99.51      |
|          |           | 293.85     | $(3.17 \pm 0.10) \times 10^{-2}$ | $-(3.1 \pm 2.8) \times 10^{-3}$    | 99.46      |
|          |           | 298.25     | $(4.42 \pm 0.12) \times 10^{-2}$ | $-(1.1 \pm 2.9) \times 10^{-3}$    | 99.42      |
| IBN      | DI water  | 293.25     | $(4.74 \pm 0.08) \times 10^{-2}$ | $(2.6 \pm 1.0) \times 10^{-3}$     | 99.96      |

**Table S5. Dimensionless Henry's law constants of EN, IPN, and IBN. Uncertainties are at the  $\pm 1\sigma$  level. n/d = not determined.**

| Compound            | $T$ (K)<br>/ Reference | $H_S^{cc}$ (unitless)       |                |                             |                             |                |               |
|---------------------|------------------------|-----------------------------|----------------|-----------------------------|-----------------------------|----------------|---------------|
|                     |                        | 283.25                      | 284.65         | 293.85                      | 298.65                      | 304.95         | 309.65        |
| EN in<br>n-octanol  | 1                      | 896 $\pm$ 200<br>(281.7 K)  | n/d            | 535 $\pm$ 30<br>(293.2 K)   | 378 $\pm$ 37<br>(298.2 K)   | n/d            | n/d           |
| IPN in<br>n-octanol | This work              | n/d                         | 1547 $\pm$ 53  | 972 $\pm$ 36                | 864 $\pm$ 13                | 706 $\pm$ 43   | 463 $\pm$ 30  |
| IBN in<br>n-octanol | This work              | n/d                         | 4869 $\pm$ 339 | 2726 $\pm$ 50               | 2417 $\pm$ 119              | 1599 $\pm$ 156 | 1289 $\pm$ 50 |
| EN in DI<br>water   | 1                      | 91.9 $\pm$ 1.1<br>(281.7 K) | n/d            | 48.8 $\pm$ 1.5<br>(293.2 K) | 38.0 $\pm$ 0.7<br>(298.2 K) | n/d            | n/d           |
| IPN in DI<br>water  | This work              | 56.0 $\pm$ 2.0              | n/d            | 31.5 $\pm$ 1.0              | 22.6 $\pm$ 0.6              | n/d            | n/d           |
| IBN in DI<br>water  | This work              | n/d                         | n/d            | 21.1 $\pm$ 0.4              | n/d                         | n/d            | n/d           |

75 **Table S6. Liquid-phase loss rate constants of EN, IPN and IBN. Uncertainties are at the  $\pm 1\sigma$  level. n/d = not determined.**

| Compound            | $T$ (K)<br>/ Reference | $k_1$<br>( $10^{-5} \text{ s}^{-1}$ ) |           |                       |                       |            |           |
|---------------------|------------------------|---------------------------------------|-----------|-----------------------|-----------------------|------------|-----------|
|                     |                        | 283.25                                | 284.65    | 293.85                | 298.65                | 304.95     | 309.65    |
| EN in<br>n-octanol  | 1                      | 0.8±1.9<br>(281.7 K)                  | n/d       | -0.9±1.3<br>(293.2 K) | -4.7±2.3<br>(298.2 K) | n/d        | n/d       |
| IPN in<br>n-octanol | This work              | n/d                                   | 0.17±0.13 | -0.10±0.21            | 0.11±0.09             | 0.67±0.50  | 0.07±0.86 |
| IBN in<br>n-octanol | This work              | n/d                                   | 0.13±0.08 | -0.06±0.04            | 0.13±0.11             | -0.04±0.36 | 0.39±0.18 |
| EN in DI<br>water   | 1                      | 0.4±0.6<br>(281.7 K)                  | n/d       | 0.1±3.8<br>(293.2 K)  | 5.8±2.2<br>(298.2 K)  | n/d        | n/d       |
| IPN in DI<br>water  | This work              | -2.7±2.6                              | n/d       | -5.2±4.6              | -1.8±4.9              | n/d        | n/d       |
| IBN in DI<br>water  | This work              | n/d                                   | n/d       | 4.3±1.7               | n/d                   | n/d        | n/d       |

## References

- 80 1. K. D. Easterbrook, M. A. Vona and H. D. Osthoff, Measurement of Henry's law constants of ethyl nitrate in deionized water, synthetic sea salt solutions, and n-octanol, *Chemosphere*, 2024, **346**, 140482.
2. J. Kames and U. Schurath, Alkyl nitrates and bifunctional nitrates of atmospheric interest - Henry Law Constants and their temperature dependencies, *J. Atmos. Chem.*, 1992, **15**, 79-95.

85
